# Supplementary material for: Synthesis and crystal structures of Zn(ii) and Co(ii) coordination compounds with ortho substituted pyridine ligands: two structure types and polymorphism in the region of their coexistence
Source: Royal Society of Chemistry journal article supplement (doi:10.1039/c3ce40208h), 2013-01-01
Supplement: c3ce40208h.pdf [file c3ce40208h.pdf]

**Synthesis and crystal structures of Zn(II) and Co(II) coordination compounds with ortho substituted pyridine ligands: Two structure types and polymorphism in the region of their coexistence.**

Susanne Wöhlert, Inke Jess, Ulli Englert and Christian Näther\*

---

|            |                                                                       |    |
|------------|-----------------------------------------------------------------------|----|
| Figure S1  | ORTEP plot of compound <b>1-Zn</b>                                    | 2  |
| Figure S2  | ORTEP plot of compound <b>2-Zn</b>                                    | 3  |
| Figure S3  | ORTEP plot of compound <b>3-Co<math>\alpha</math></b>                 | 4  |
| Figure S4  | ORTEP plot of compound <b>3-Co<math>\beta</math></b>                  | 5  |
| Table S1   | Crystal data of compound <b>3-Co<math>\beta</math></b> at $T = 200$ K | 6  |
| Figure S5  | ORTEP plot of compound <b>3-Zn<math>\alpha</math></b>                 | 7  |
| Figure S6  | ORTEP plot of compound <b>3-Zn<math>\beta</math></b>                  | 8  |
| Figure S7  | Comparison of molecular geometries                                    | 9  |
| Figure S8  | XRPD of compound <b>1-Co</b>                                          | 10 |
| Figure S9  | XRPD of compound <b>1-Zn</b>                                          | 10 |
| Figure S10 | XRPD of compound <b>2-Co</b>                                          | 11 |
| Figure S11 | XRPD of compound <b>2-Zn</b>                                          | 11 |
| Figure S12 | XRPD of compound <b>3-Co<math>\alpha</math></b>                       | 12 |
| Figure S13 | XRPD of compound <b>3-Co<math>\beta</math></b>                        | 12 |
| Figure S14 | XRPD of compound <b>3-Zn<math>\alpha</math></b>                       | 13 |
| Figure S15 | DSC measurement of compound <b>1-Co</b>                               | 13 |
| Figure S16 | DSC measurement of compound <b>1-Zn</b>                               | 14 |
| Figure S17 | DSC measurement of compound <b>2-Co</b>                               | 14 |
| Figure S18 | DSC measurement of compound <b>2-Zn</b>                               | 15 |
| Figure S19 | DSC measurement of compound <b>3-Co<math>\beta</math></b>             | 15 |
| Figure S20 | XRPD of the intermediates of compound <b>1-Zn</b>                     | 16 |
| Figure S21 | XRPD of the intermediates of compound <b>2-Co</b>                     | 16 |
| Figure S22 | XRPD of the intermediates of compound <b>3-Co<math>\beta</math></b>   | 17 |
| Figure S23 | XRPD of <b>3-Zn<math>\alpha</math></b> at 130 °C and 160 °C           | 17 |
| Figure S24 | XRPD of <b>3-Co<math>\alpha</math></b> at 130 °C and 160 °C           | 18 |
| Figure S25 | IR spectrum of compound <b>1-Co</b>                                   | 18 |
| Figure S26 | IR spectrum of compound <b>1-Zn</b>                                   | 19 |
| Figure S27 | IR spectrum of compound <b>2-Co</b>                                   | 19 |
| Figure S28 | IR spectrum of compound <b>2-Zn</b>                                   | 20 |
| Figure S29 | IR spectrum of compound <b>3-Co<math>\alpha</math></b>                | 20 |
| Figure S30 | IR spectrum of compound <b>3-Co<math>\beta</math></b>                 | 21 |
| Figure S31 | IR spectrum of compound <b>3-Zn<math>\alpha</math></b>                | 21 |

---

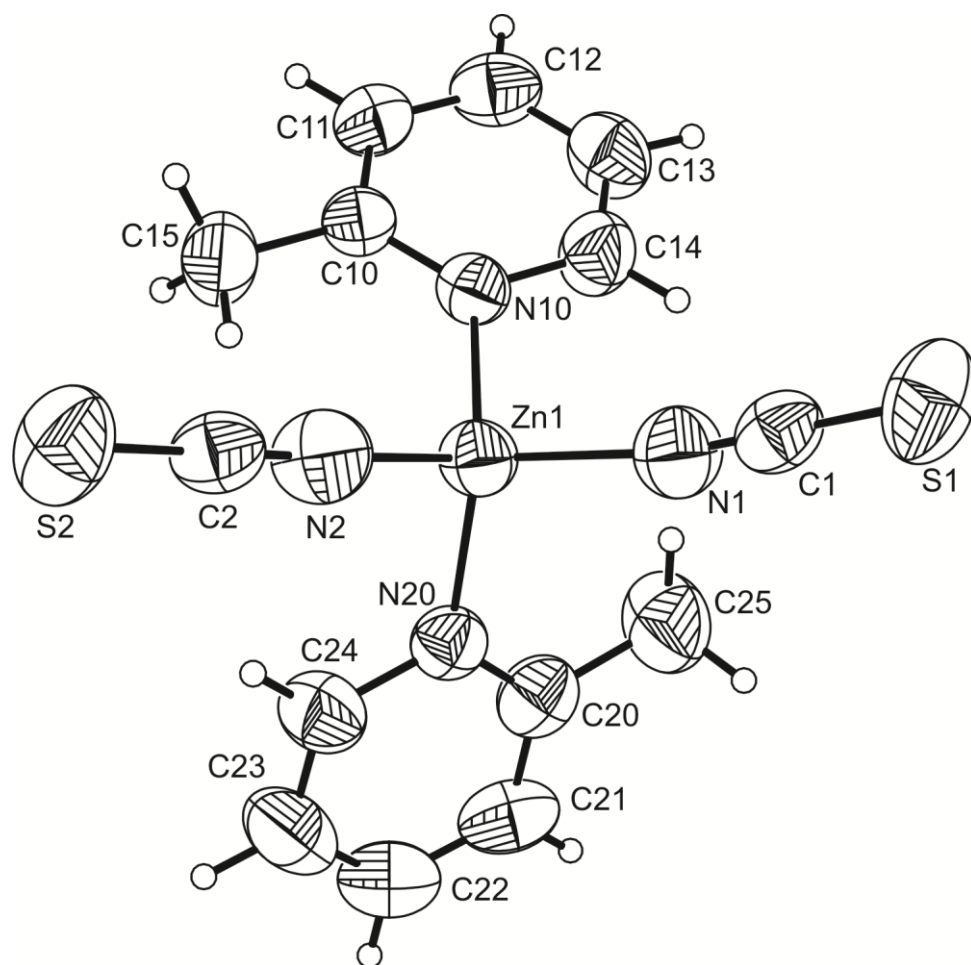

**Figure S1.** Crystal structure of Zn(NCS)<sub>2</sub>(2-methylpyridine)<sub>2</sub> (**1-Zn**) with view of the coordination sphere of the zinc(II) cation with labeling and displacement ellipsoids drawn at 50 % probability level.

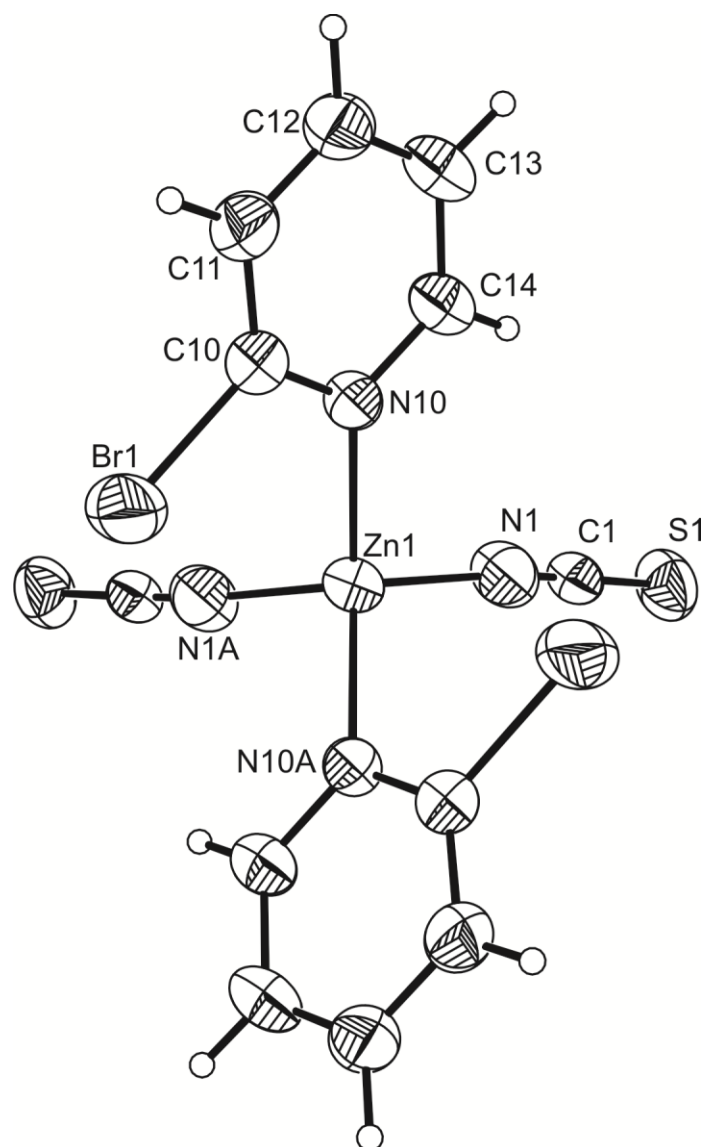

**Figure S2.** Crystal structure of  $\text{Zn}(\text{NCS})_2(2\text{-bromopyridine})_2$  (**2-Zn**) with view of the coordination sphere of the zinc(II) cation with labeling and displacement ellipsoids drawn at 50 % probability level. Symmetry code: A =  $-x + 1, y, -z + \frac{1}{2}$ .

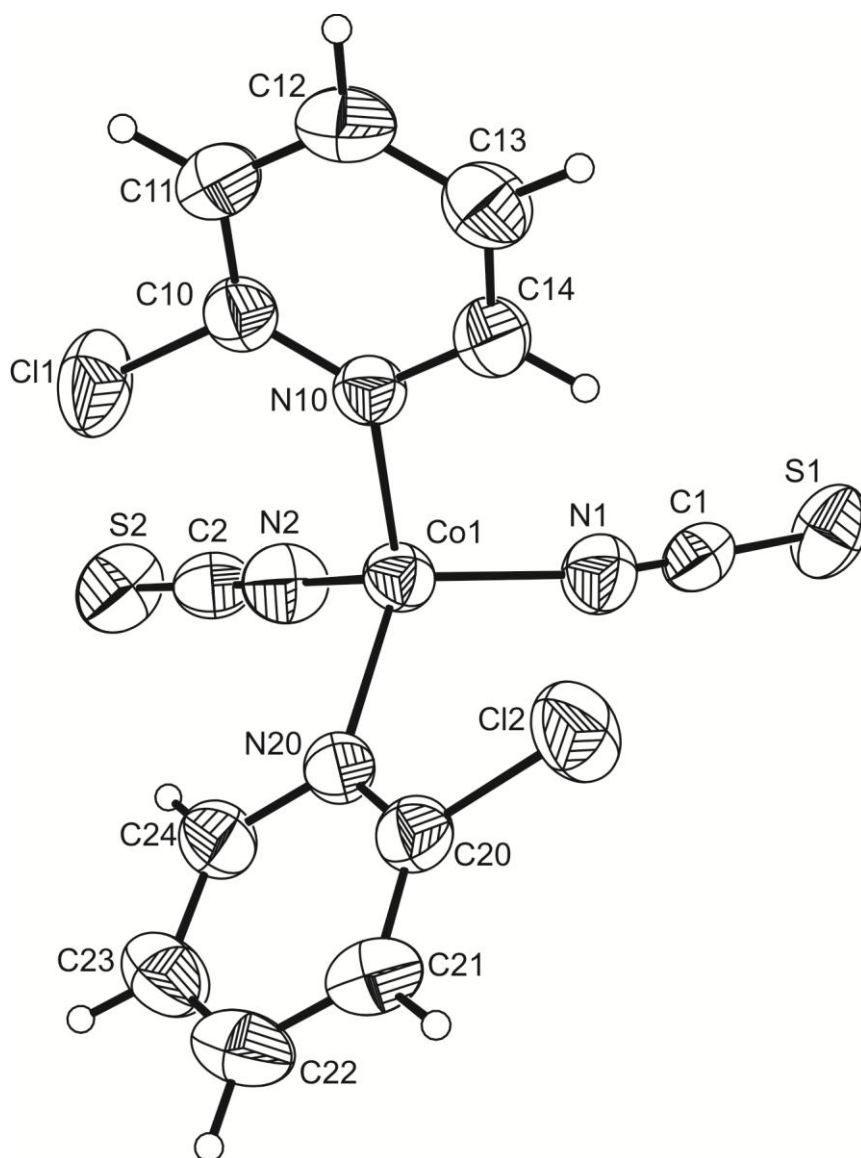

**Figure S3.** Crystal structure of  $\text{Co}(\text{NCS})_2(2\text{-chloropyridine})_2$  (**3-Co $\alpha$** ) with view of the coordination sphere of the cobalt(II) cation with labeling and displacement ellipsoids drawn at 50 % probability level.

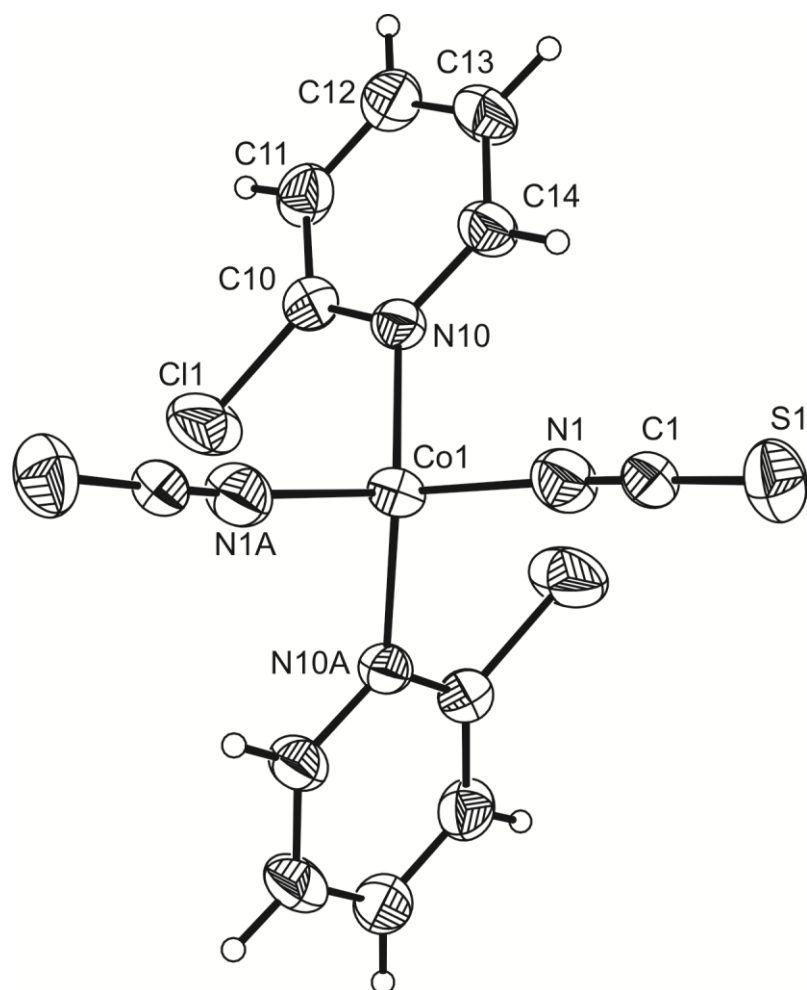

**Figure S4.** Crystal structure of  $\text{Co}(\text{NCS})_2(2\text{-chloropyridine})_2$  (**3-Co $\beta$** ) with view of the coordination sphere of the cobalt(II) cation with labeling and displacement ellipsoids drawn at 50 % probability level. Symmetry code: A = -x, y, -z + 1/2.

**Table S1.** Selected crystal data on the structure determination from single crystal data for compound  $\text{Co}(\text{NCS})_2(2\text{-chloropyridine})_2$  (**3-Co $\beta$** ) at  $T = 200$  K.

| compound                                                     | <b>3-Co<math>\beta</math></b>                              |
|--------------------------------------------------------------|------------------------------------------------------------|
| Formula                                                      | $\text{C}_{12}\text{H}_8\text{Cl}_2\text{CoN}_4\text{S}_2$ |
| MW / $\text{g}\cdot\text{mol}^{-1}$                          | 402.17                                                     |
| Crystal system                                               | orthorhombic                                               |
| Space group                                                  | <i>Pbcn</i>                                                |
| $a / \text{\AA}$                                             | 11.2928(7)                                                 |
| $b / \text{\AA}$                                             | 9.7123(5)                                                  |
| $c / \text{\AA}$                                             | 15.1913(8)                                                 |
| $V / \text{\AA}^3$                                           | 1666.17(16)                                                |
| $T / \text{K}$                                               | 200                                                        |
| $Z$                                                          | 4                                                          |
| $D_{\text{calc}} / \text{mg}\cdot\text{m}^{-3}$              | 1.603                                                      |
| $\mu / \text{mm}^{-1}$                                       | 1.597                                                      |
| $\theta_{\text{max}} / ^\circ$                               | 28.03                                                      |
| Refl. collected                                              | 11189                                                      |
| Unique reflections                                           | 2005                                                       |
| $R_{\text{int}}$                                             | 0.0342                                                     |
| Refl. [ $F_0 > 4\sigma(F_0)$ ]                               | 1671                                                       |
| Parameters                                                   | 97                                                         |
| $R_1$ [ $F_0 > 4\sigma(F_0)$ ]                               | 0.0312                                                     |
| $wR_2$                                                       | 0.0799                                                     |
| GOF                                                          | 1.036                                                      |
| $\Delta\rho_{\text{max/min}} / \text{e}\cdot\text{\AA}^{-3}$ | 0.377 / -0.442                                             |

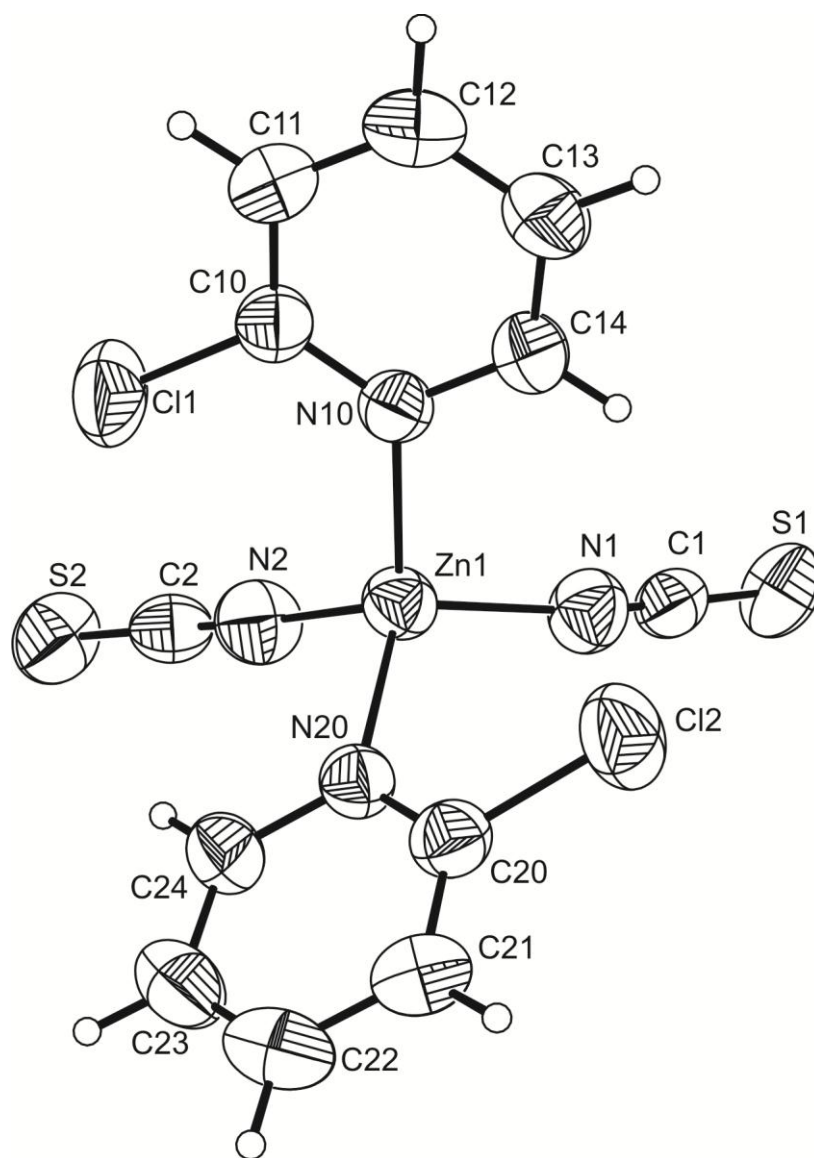

**Figure S5.** Crystal structure of Zn(NCS)<sub>2</sub>(2-chloropyridine)<sub>2</sub> (**3-Znα**) with view of the coordination sphere of the zinc(II) cation with labeling and displacement ellipsoids drawn at 50 % probability level.

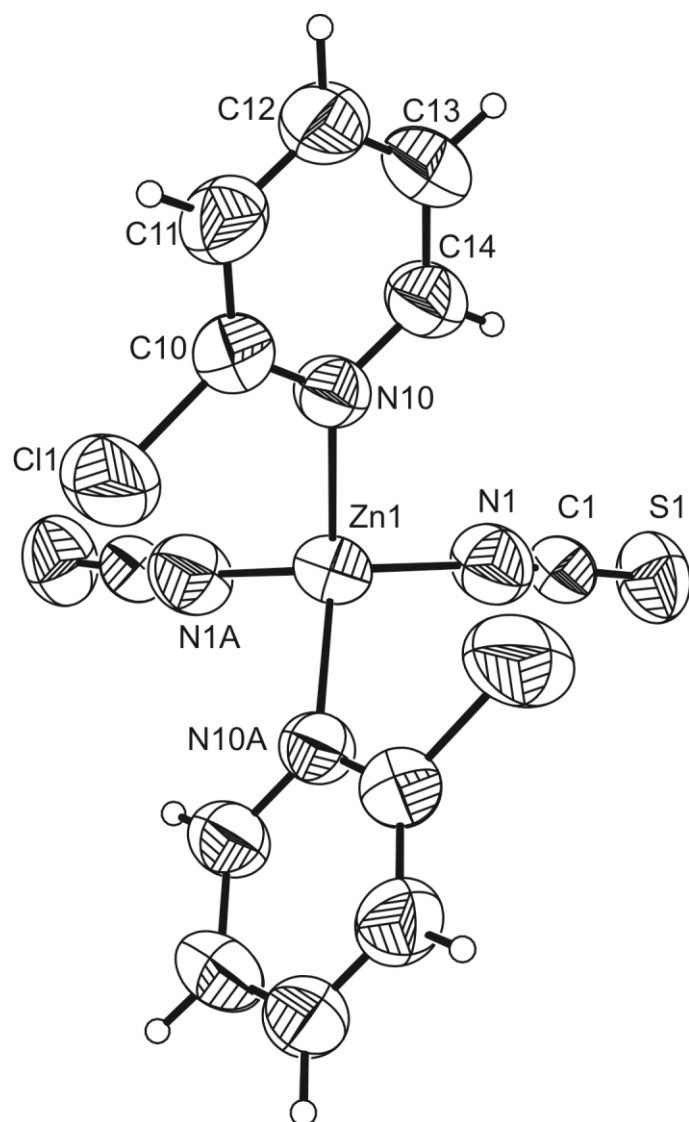

**Figure S6.** Crystal structure of Zn(NCS)<sub>2</sub>(2-chloropyridine)<sub>2</sub> (**3-Znβ**) with view of the coordination sphere of the zinc(II) cation with labeling and displacement ellipsoids drawn at 50 % probability level. Symmetry code: A = -x + 1, y, -z + 3/2.



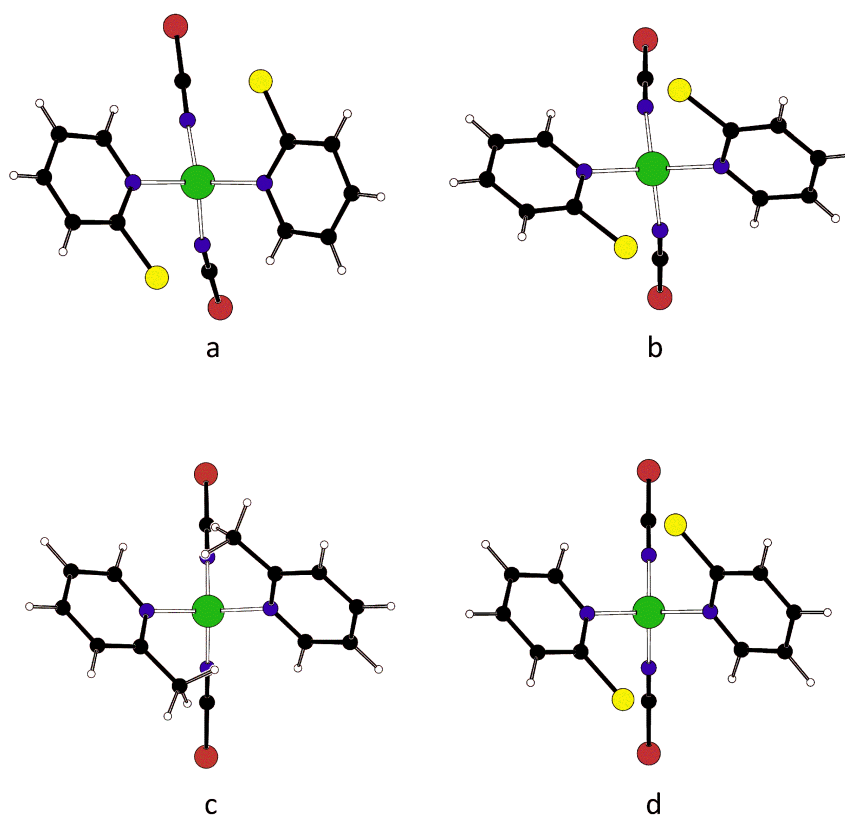

**Figure S7.** Comparison of molecular geometries: a) Molecule of **3-Zn $\alpha$**  as found in the crystal (space group  $P2_12_12_1$ ); b) Molecule of **3-Zn $\beta$**  (crystals in  $Pbcn$ ); c) Molecule of **3-Zn $\alpha$**  after force field energy minimization; d) Molecule of **1-Zn** after force field energy minimization. Note the similarity between the experimentally determined molecular structure in  $Pbcn$  (b) and the minimization results (c and d).

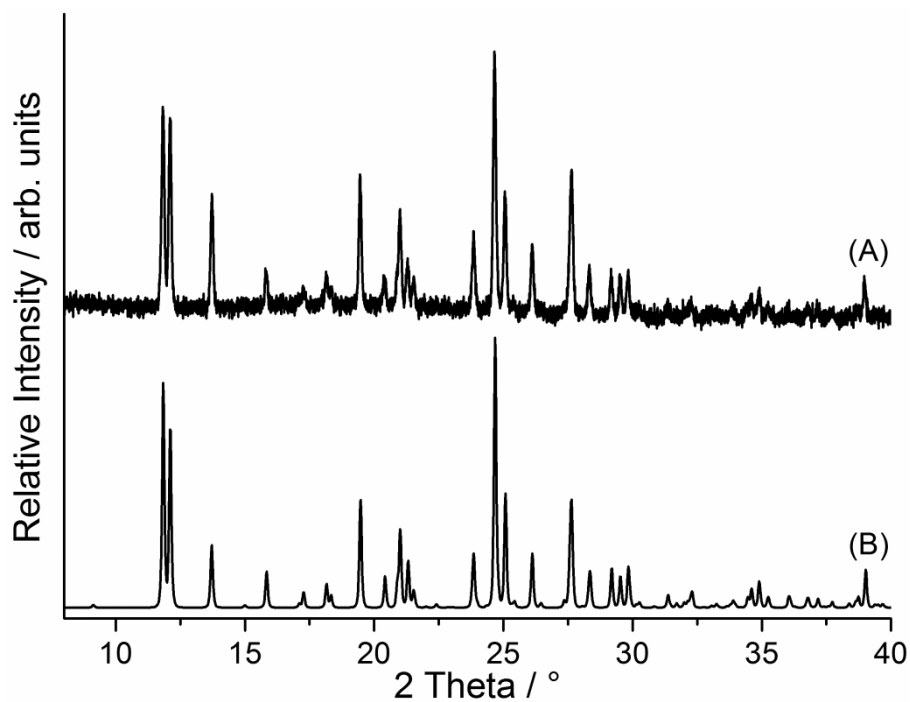

**Figure S8.** Experimental XRPD pattern of compound **1-Co** (A) and XRPD calculated from single crystal data of compound **1-Co** (B).

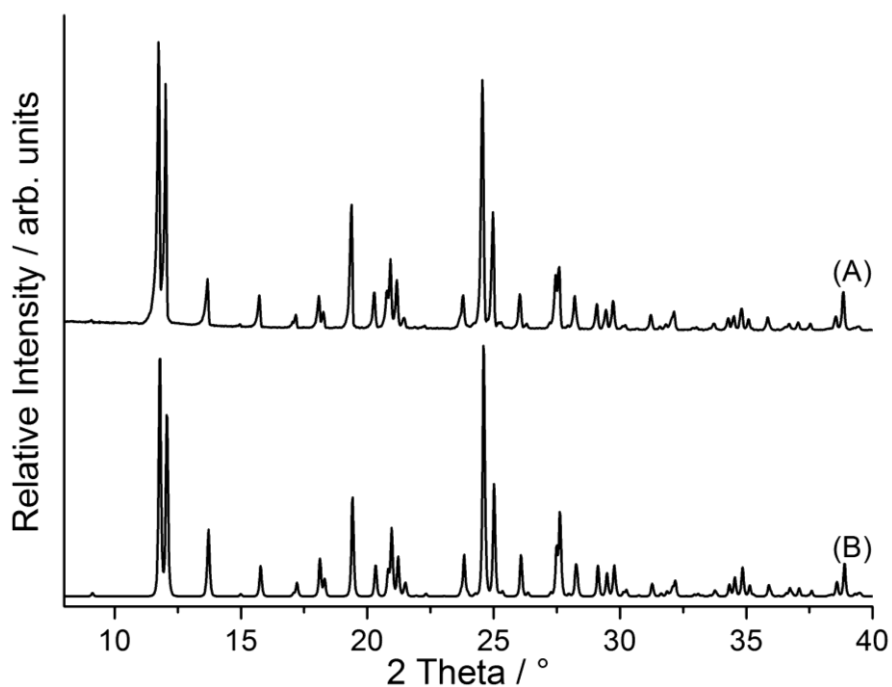

**Figure S9.** Experimental XRPD pattern of compound **1-Zn** (A) and XRPD calculated from single crystal data of compound **1-Zn** (B).

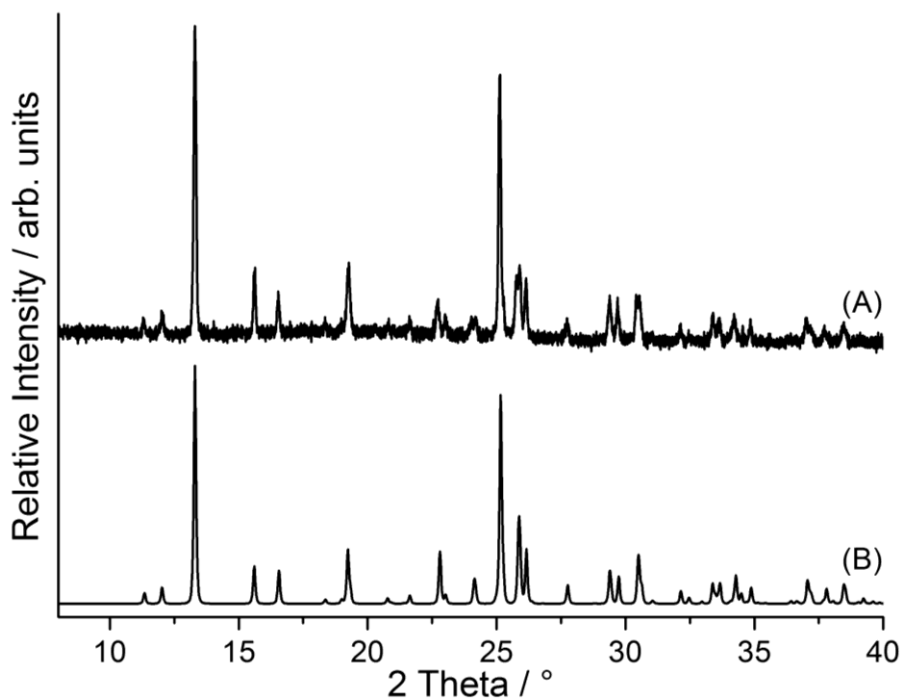

**Figure S10.** Experimental XRPD pattern of compound **2-Co** (A) and XRPD calculated from single crystal data of compound **2-Co** (B).

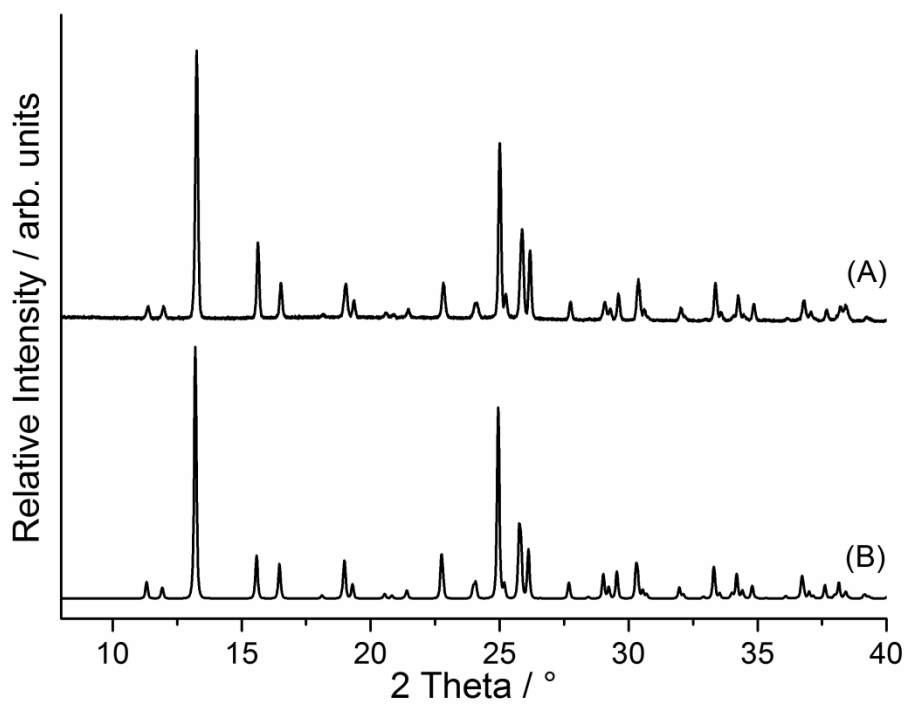

**Figure S11.** Experimental XRPD pattern of compound **2-Zn** (A) and XRPD calculated from single crystal data of compound **2-Zn** (B).

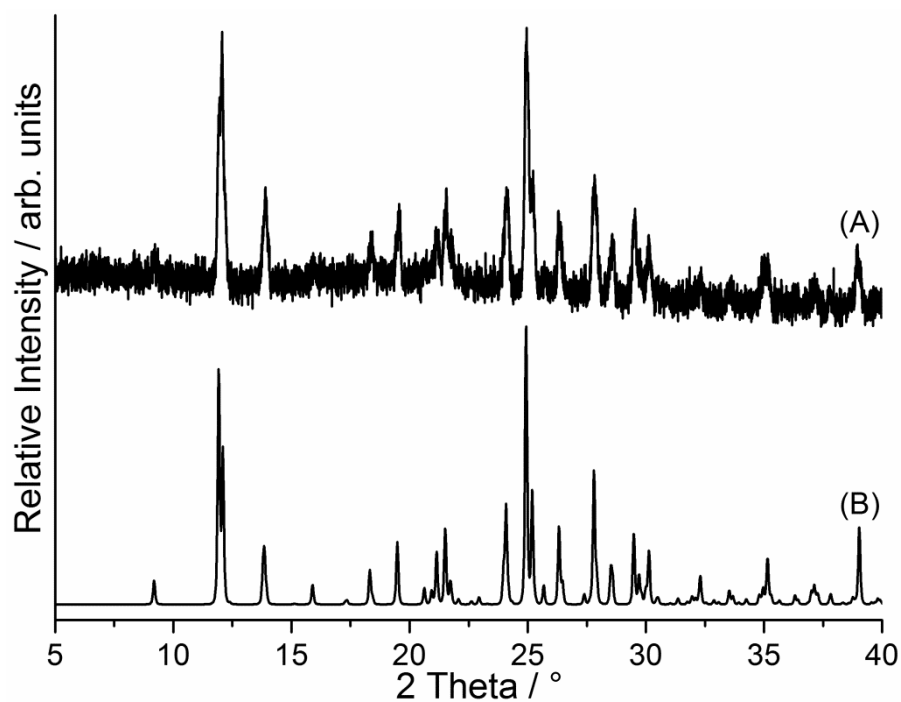

**Figure S12.** Experimental XRPD pattern of compound **3-Co $\alpha$**  (A) and XRPD calculated from single crystal data of compound **3-Co $\alpha$**  (B).

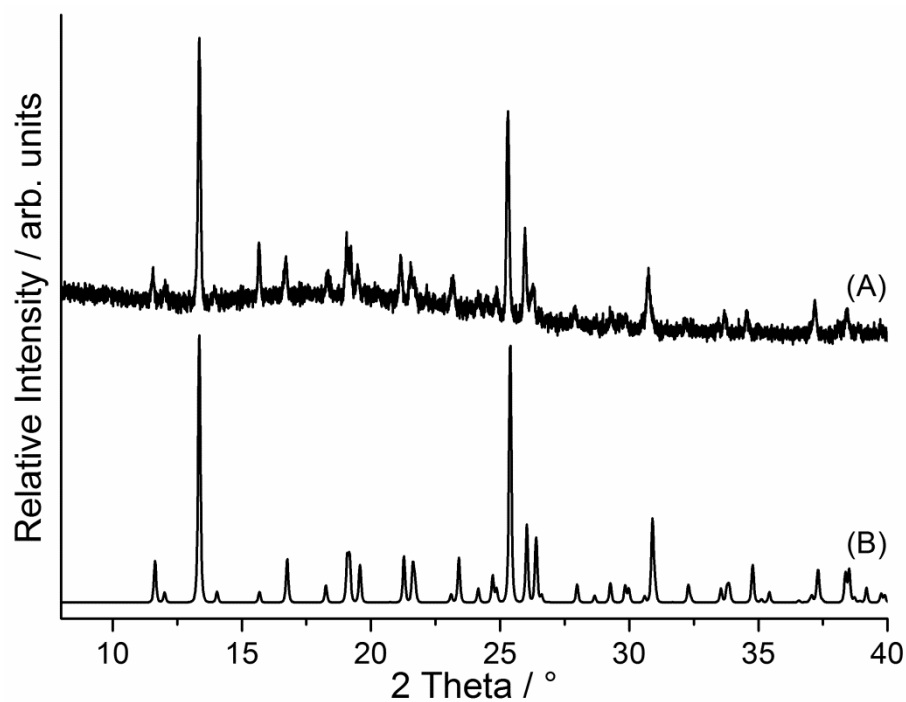

**Figure S13.** Experimental XRPD pattern of compound **3-Co $\beta$**  (A) and XRPD calculated from single crystal data of compound **3-Co $\beta$**  (B).

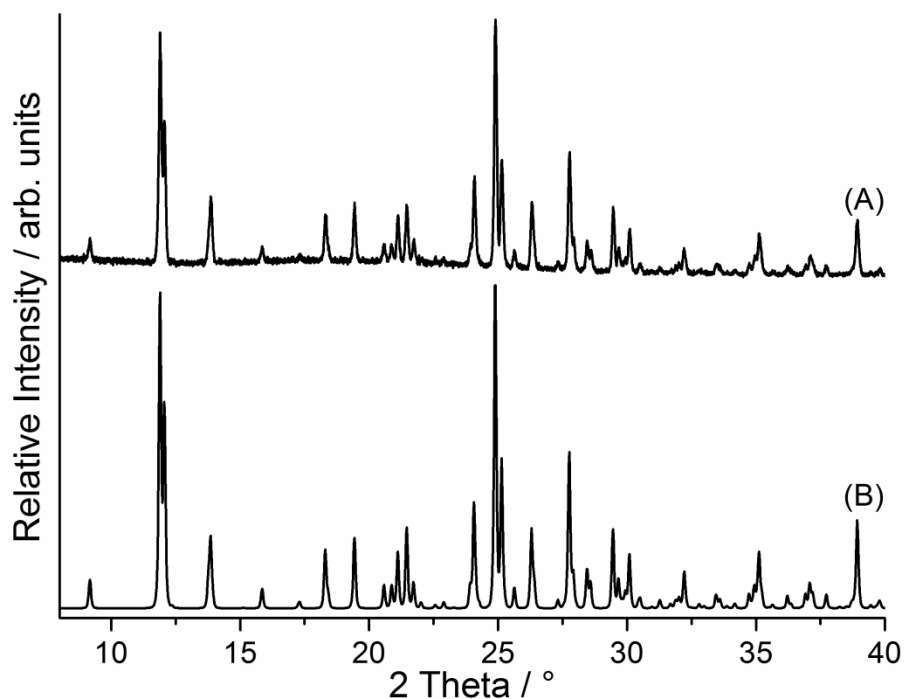

**Figure S14.** Experimental XRPD pattern of compound **3-Zn $\alpha$**  (A) and XRPD calculated from single crystal data of compound **3-Zn $\alpha$**  (B).

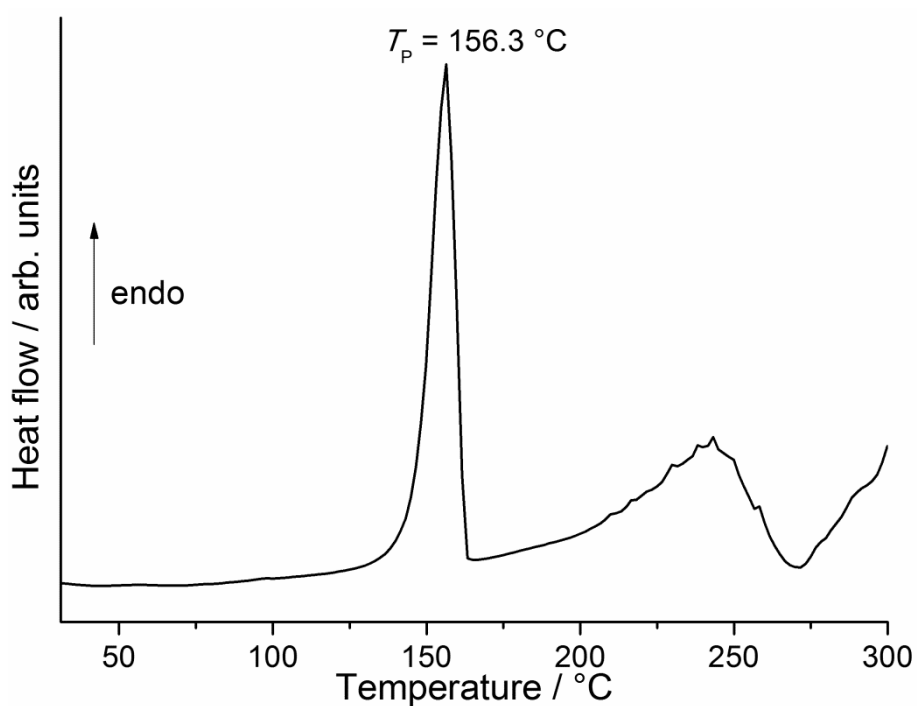

**Figure S15.** Differential scanning calorimetry (DSC) measurement for compound **1-Co**.

Heating rate  $3\text{ °C}\cdot\text{min}^{-1}$ ;  $\text{N}_2$  atmosphere;  $T_p$  = peak temperature ( $^{\circ}\text{C}$ ).

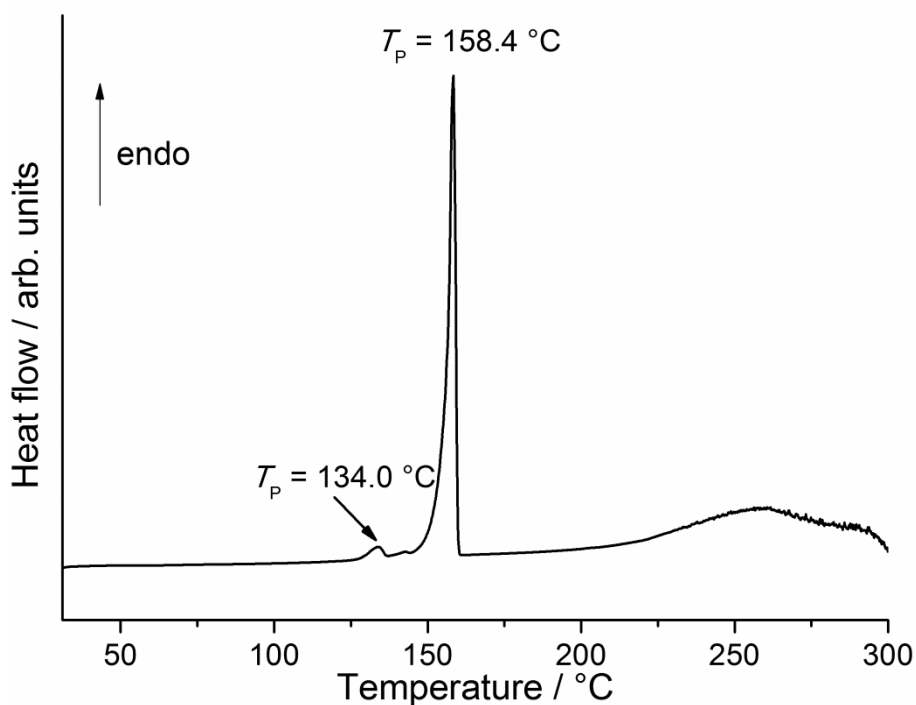

**Figure S16.** Differential scanning calorimetry (DSC) measurement for compound **1-Zn**.

Heating rate  $3\text{ °C}\cdot\text{min}^{-1}$ ;  $\text{N}_2$  atmosphere;  $T_p$  = peak temperature ( $^{\circ}\text{C}$ ).

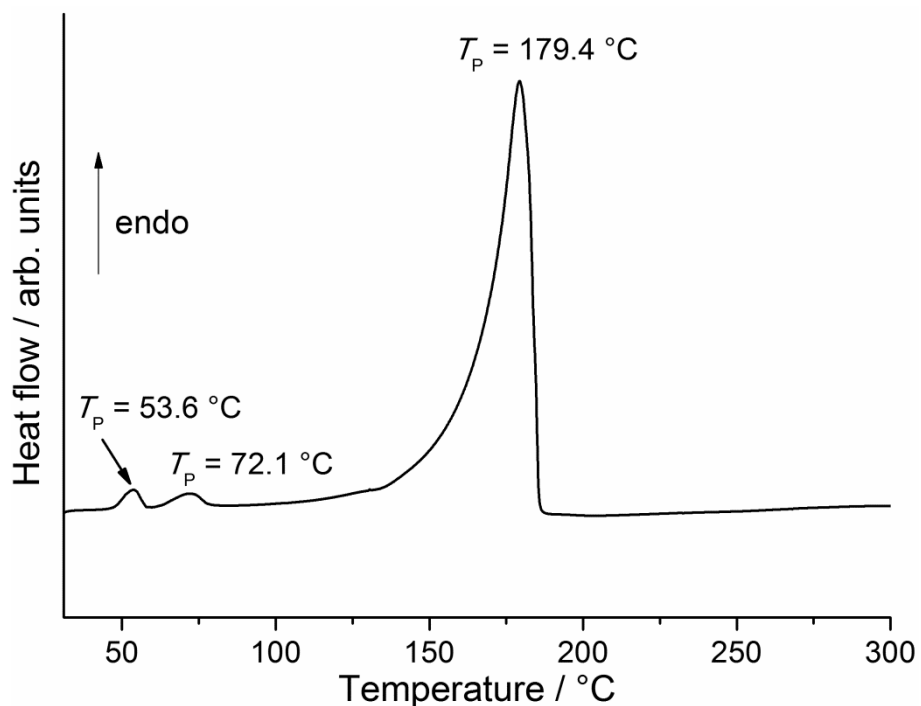

**Figure S17.** Differential scanning calorimetry (DSC) measurement for compound **2-Co**.

Heating rate  $3\text{ °C}\cdot\text{min}^{-1}$ ;  $\text{N}_2$  atmosphere;  $T_p$  = peak temperature ( $^{\circ}\text{C}$ ).

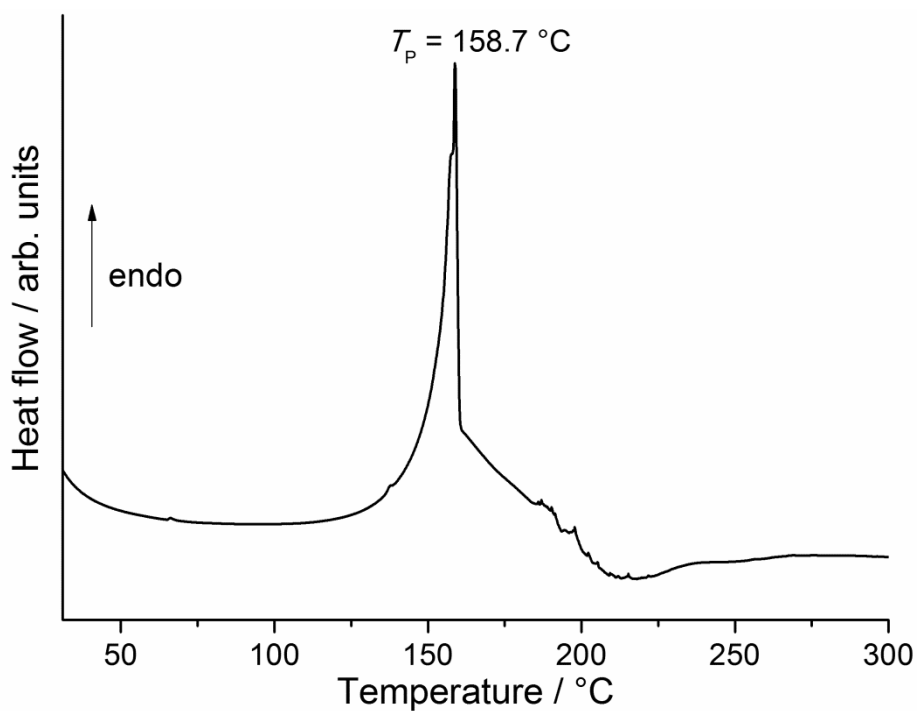

**Figure S18.** Differential scanning calorimetry (DSC) measurement for compound **2-Zn**.  
Heating rate  $3\text{ °C}\cdot\text{min}^{-1}$ ;  $\text{N}_2$  atmosphere;  $T_p$  = peak temperature ( $^{\circ}\text{C}$ ).

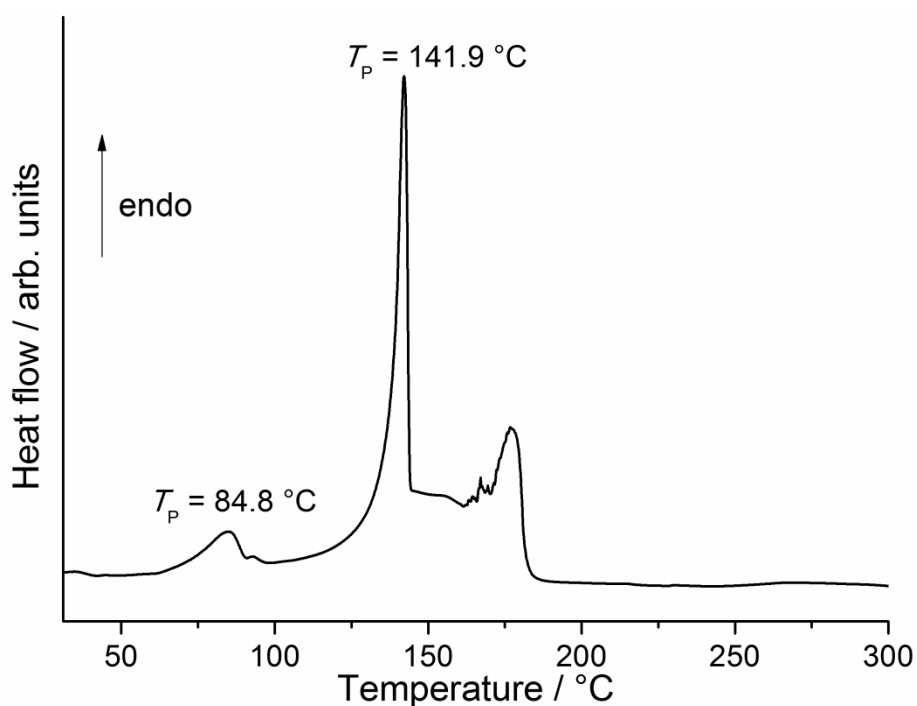

**Figure S19.** Differential scanning calorimetry (DSC) measurement for compound **3-Coβ**.  
Heating rate  $3\text{ °C}\cdot\text{min}^{-1}$ ;  $\text{N}_2$  atmosphere;  $T_p$  = peak temperature ( $^{\circ}\text{C}$ ).

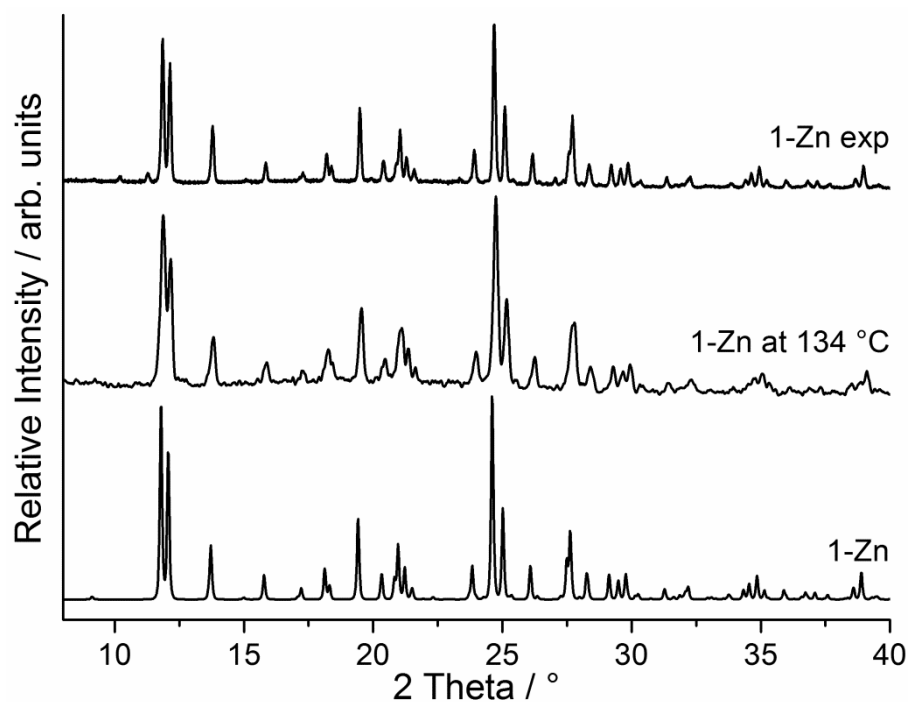

**Figure S20.** Experimental XRPD of compound **1-Zn** (top) and the intermediate, which were obtained at 134 °C in the DSC measurement of compound **1-Zn** (middle) as well as XRPD calculated from single crystal data of **1-Zn** (bottom).

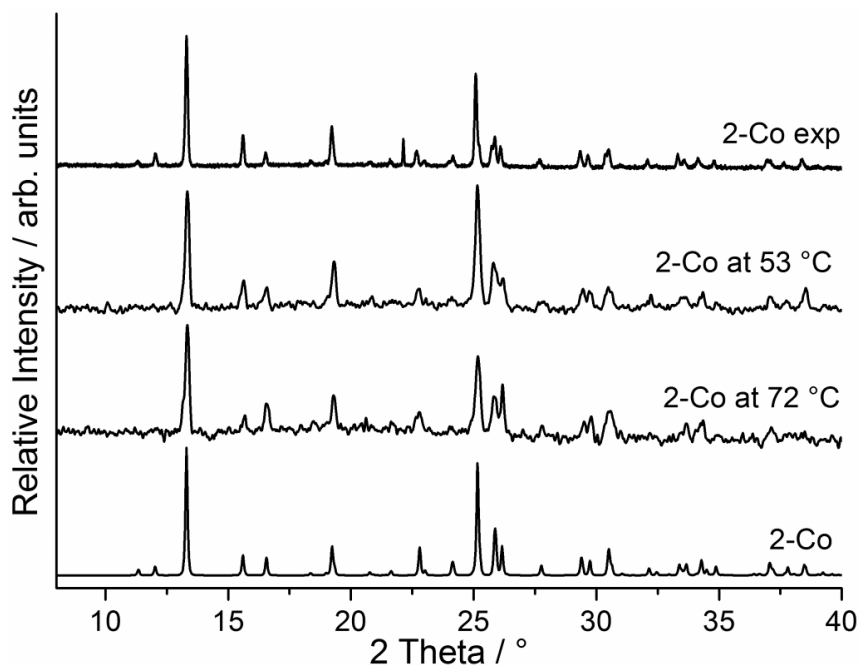

**Figure S21.** Experimental XRPD of compound **2-Co** (top) and the intermediate, which were obtained at 53 °C and 72 °C in the DSC measurement of compound **2-Co** (middle) as well as XRPD calculated from single crystal data of **2-Co** (bottom).



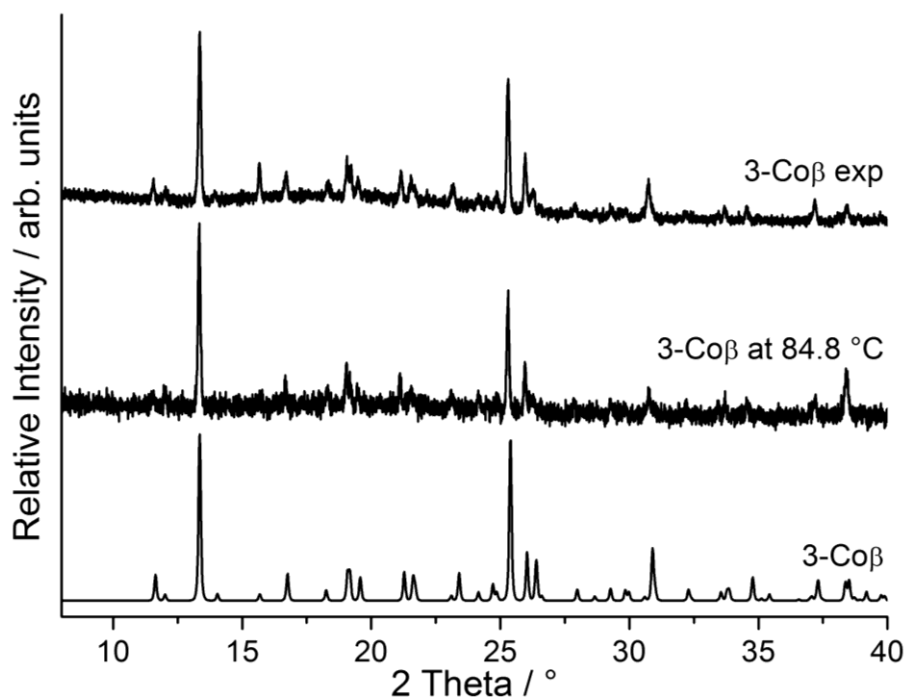

**Figure S22.** Experimental XRPD of compound **3-Coβ** (top) and the intermediate, which were obtained at 84.8 °C in the DSC measurement of compound **3-Coβ** (middle) as well as XRPD calculated from single crystal data of **3-Coβ** (bottom).

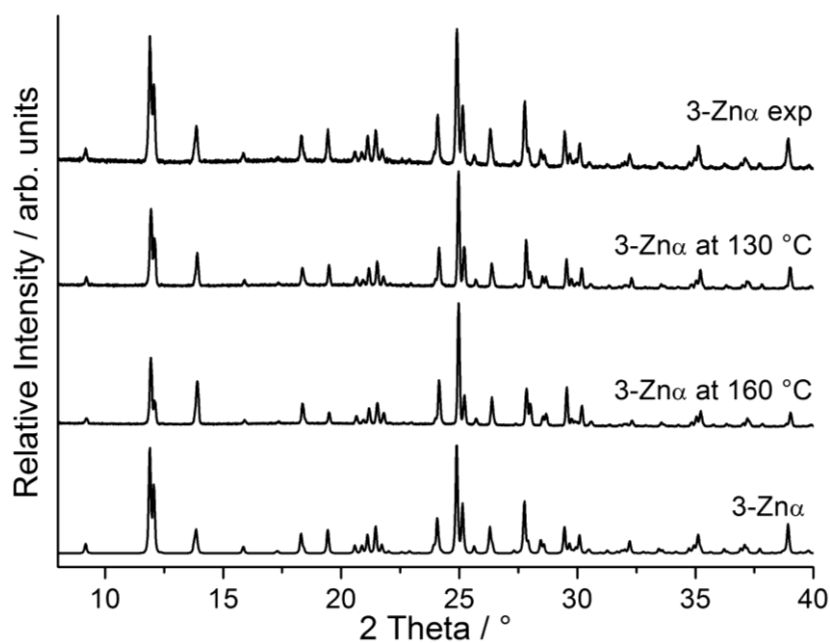

**Figure S23.** Experimental XRPD of the residues which were obtained after heating **3-Znα** at 130 °C and at 160 °C for three days in methanol and experimental and calculated powder pattern of **3-Znα**.

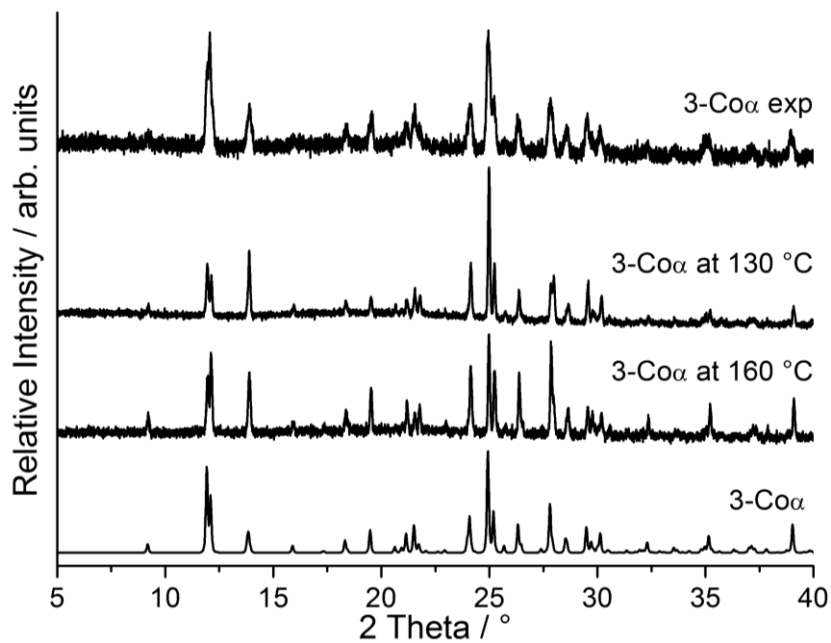

**Figure S24.** Experimental XRPD of the residues which were obtained after heating **3-Coα** at 130 °C and at 160 °C for three days in methanol and experimental and calculated powder pattern of **3-Coα**.

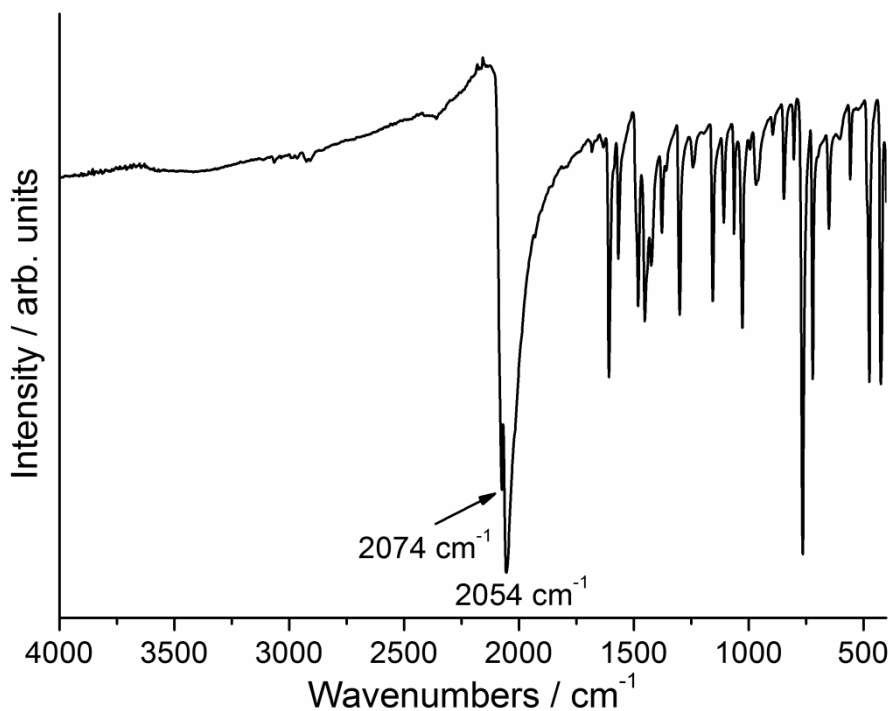

**Figure S255.** IR spectrum of  $\text{Co}(\text{NCS})_2(2\text{-methylpyridine})_2$  (**1-Co**).

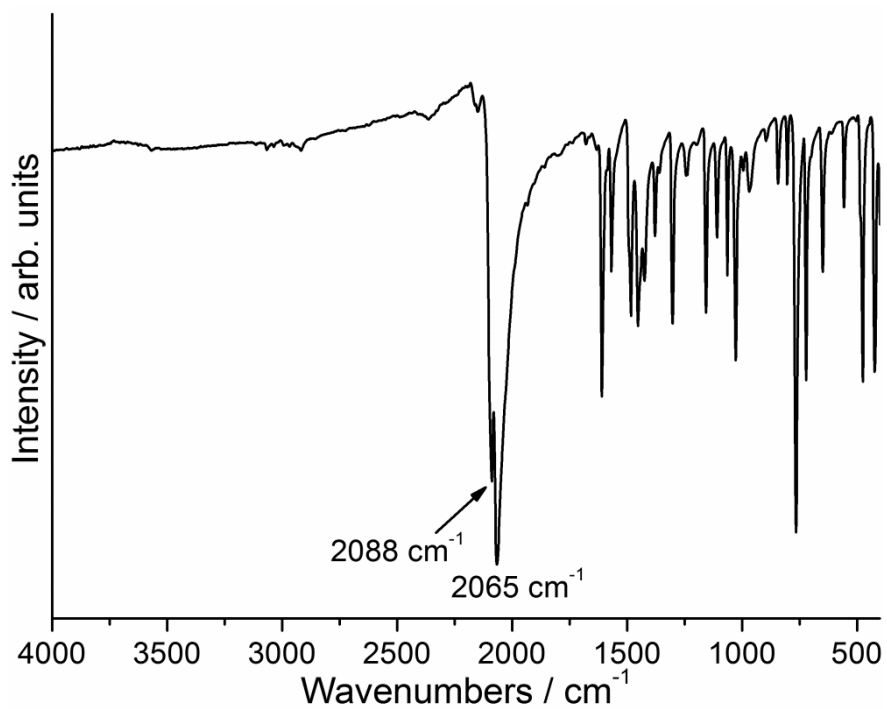

**Figure S266.** IR spectrum of Zn(NCS)<sub>2</sub>(2-methylpyridine)<sub>2</sub> (**1-Zn**).

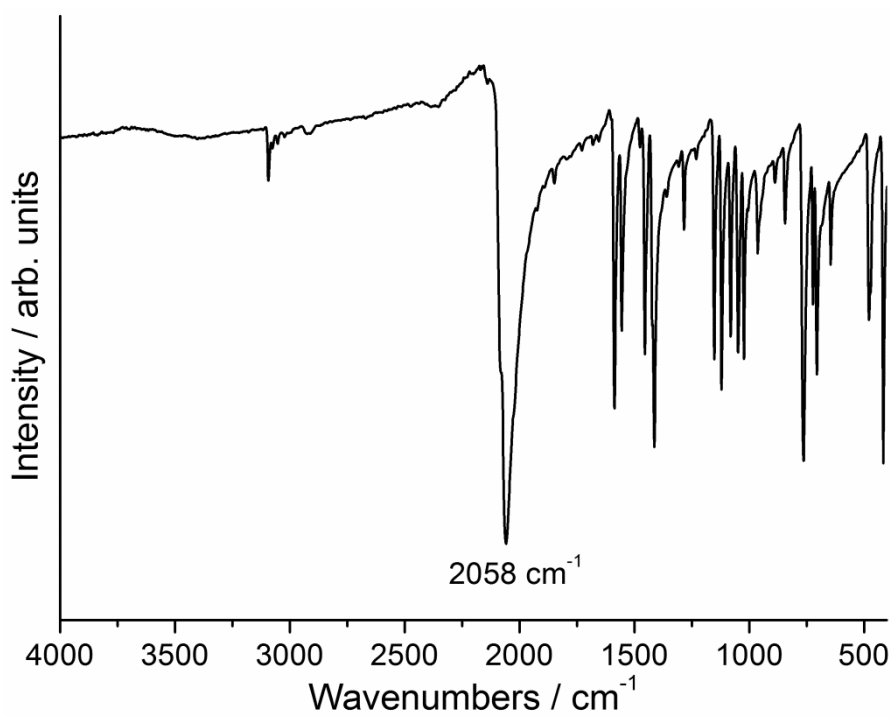

**Figure S277.** IR spectrum of Co(NCS)<sub>2</sub>(2-bromopyridine)<sub>2</sub> (**2-Co**).

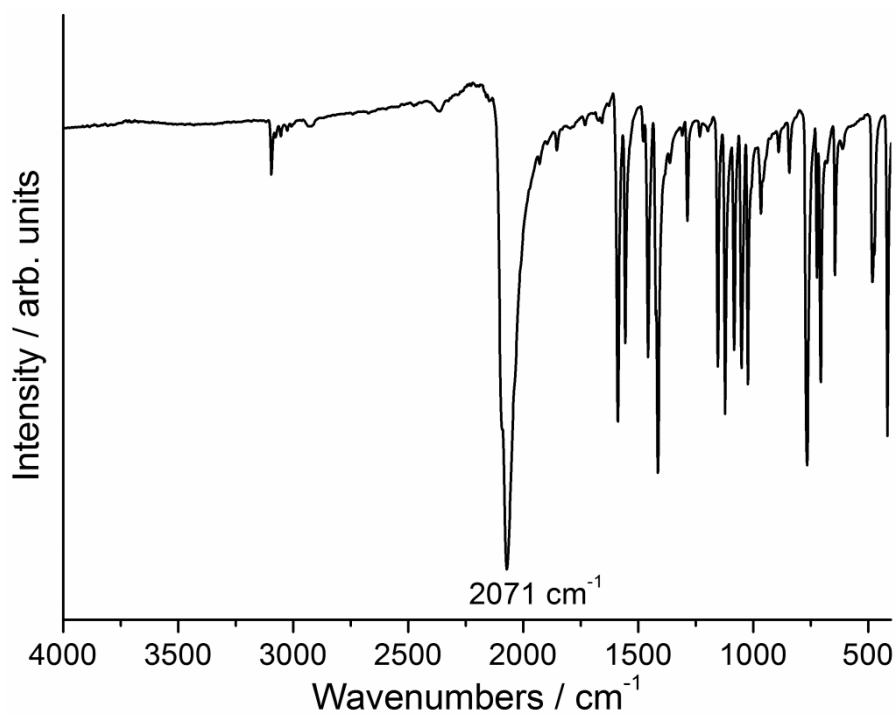

**Figure S288.** IR spectrum of  $\text{Zn}(\text{NCS})_2(2\text{-bromopyridine})_2$  (**2-Zn**).

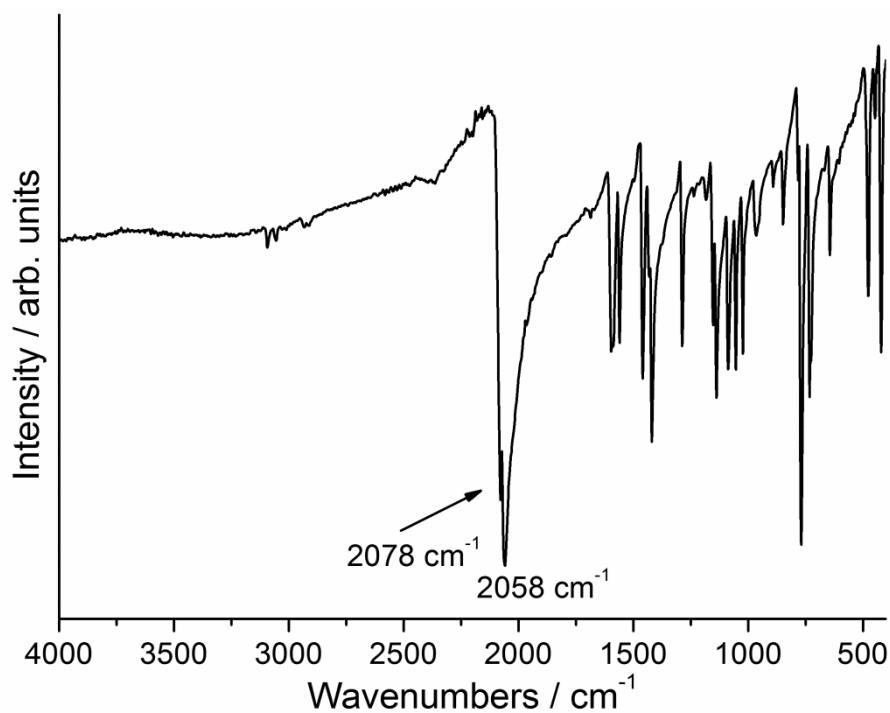

**Figure S29.** IR spectrum of  $\text{Co}(\text{NCS})_2(2\text{-chloropyridine})_2$  (**3-Co $\alpha$** ).

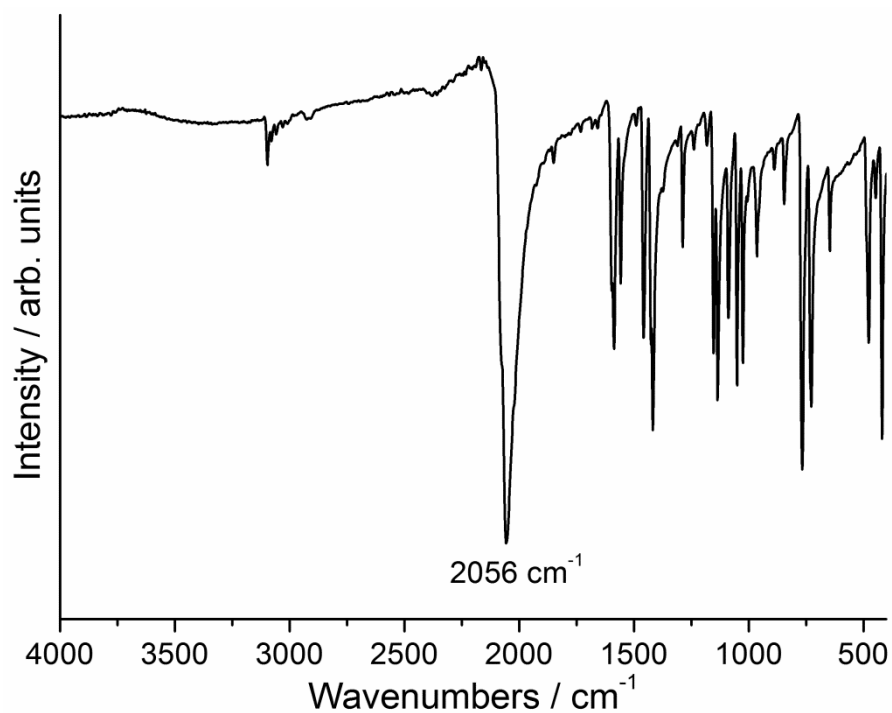

**Figure S30.** IR spectrum of  $\text{Co}(\text{NCS})_2(2\text{-chloropyridine})_2$  (**3-Coβ**).

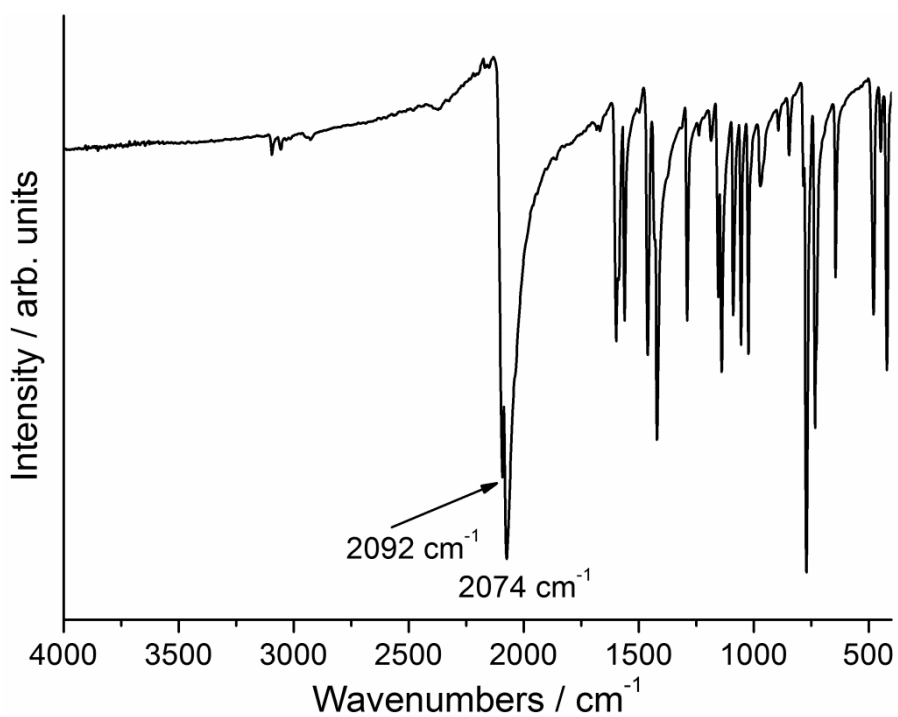

**Figure S291.** IR spectrum of  $\text{Zn}(\text{NCS})_2(2\text{-chloropyridine})_2$  (**3-Znα**).
